# Supplementary material for: Air Quality of Work, Residential, and Traffic Areas during the COVID-19 Lockdown with Insights to Improve Air Quality
Source: MDPI journal article supplement (doi:10.3390/ijerph19020727), 2022-01-10
Supplement: s1 [file s1]

## Supplementary Materials

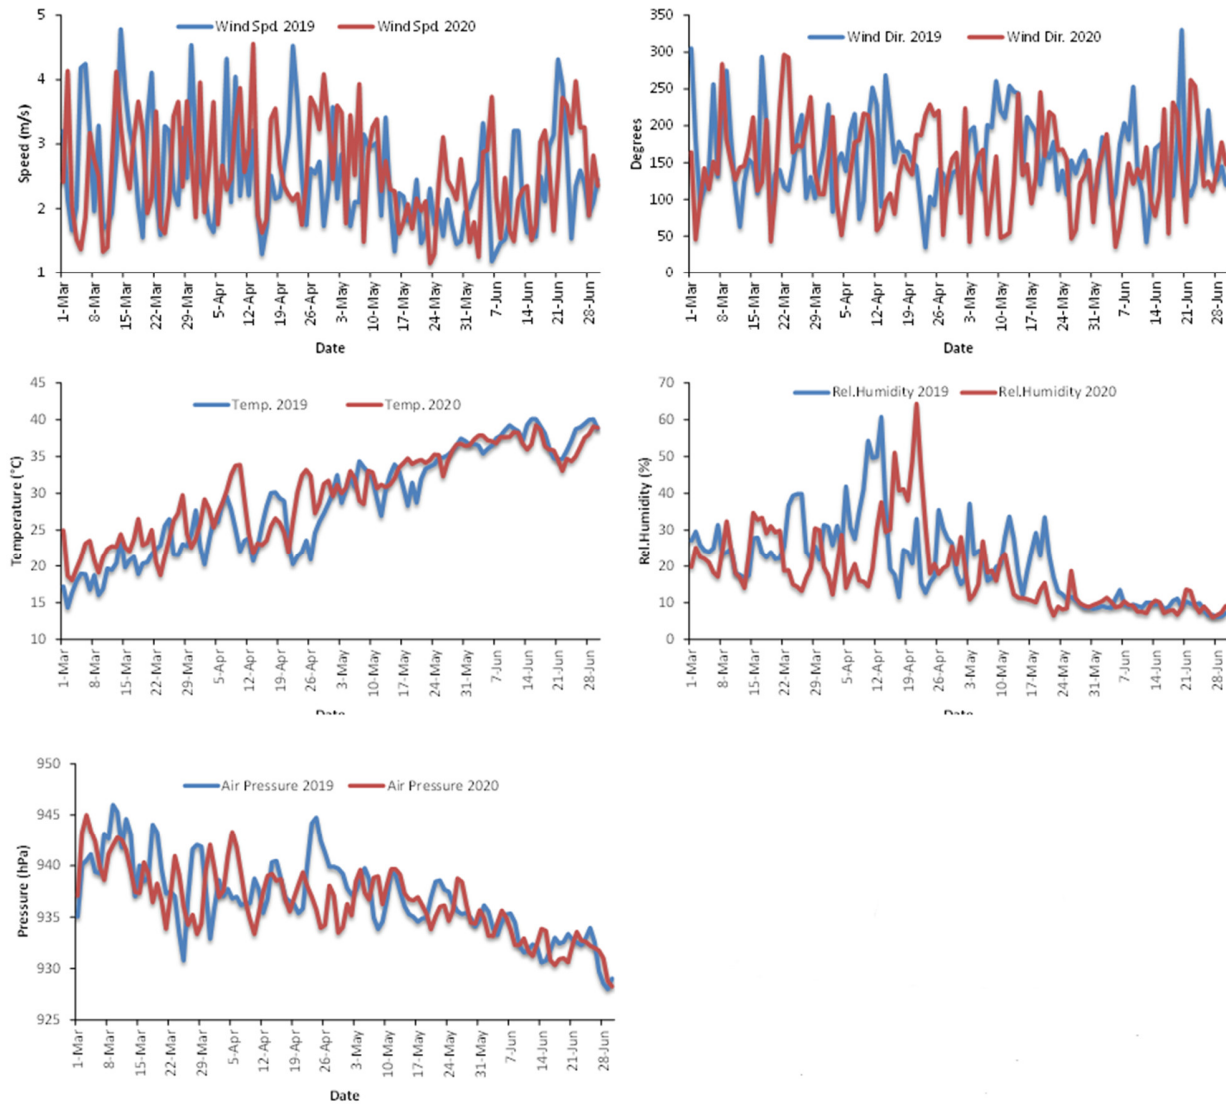

**Figure S1.** Daily mean temperature, humidity, sea level pressure, wind speed, and wind direction measured from Mar 1 - Jun 30, 2019 and 2020 in Riyadh.

**Table S1.** Breakpoints for the selected pollutants.

| Break points                          |           |                |             |                 |                 |                      |                      |          |
|---------------------------------------|-----------|----------------|-------------|-----------------|-----------------|----------------------|----------------------|----------|
| Category                              | AQI       | O <sub>3</sub> | CO          | SO <sub>2</sub> | NO <sub>2</sub> | PM <sub>2.5</sub>    | PM <sub>10</sub>     |          |
|                                       |           | (ppm)          | (ppm)       | (ppm)           | (ppm)           | (µg/m <sup>3</sup> ) | (µg/m <sup>3</sup> ) |          |
|                                       |           | 8-hour         | Hourly      | Hourly          | Hourly          | Hourly               | Daily                | Daily    |
| <b>Good</b>                           | 0 – 50    | 0.000-0.054    | -           | 0.0 – 4.4       | 0.000-0.035     | 0.000-0.053          | 0-12                 | 0-54     |
| <b>Moderate</b>                       | 51 – 100  | 0.055-0.070    | -           | 4.5-9.4         | 0.036-0.075     | 0.054-0.100          | 12.1-35.4            | 55 – 154 |
| <b>Unhealthy for sensitive groups</b> | 101 – 150 | 0.072-0.085    | 0.125-0.164 | 9.5-12.4        | 0.076-0.185     | 0.101-0.360          | 35.5-55.4            | 155-254  |
| <b>Unhealthy</b>                      | 151 – 200 | 0.086-0.105    | 0.165-0.204 | 12.5-15.4       | 0.186-0.304     | 0.361-0.649          | 55.5-150.4           | 255- 424 |
| <b>Very Unhealthy</b>                 | 201 – 300 | 0.106-0.200    | 0.205-0.404 | 15.5-30.4       | -               | 0.650-1.244          | 150.5-250.4          | 355- 424 |
| <b>Hazardous</b>                      | 301 – 400 | -              | 0.405-0.504 | 30.5-40.4       | -               | 1.245-1.644          | 250.5-350.4          | 425- 504 |
| <b>Hazardous</b>                      | 401 – 500 | -              | 0.505-0.604 | 40.5-50.4       | -               | 1.645-2.044          | 350.5-500.4          | 505-604  |

**Table S2.** Daily mean temperature, humidity, sea level pressure, wind speed, and wind direction measured from Mar 1 - Jun 30, 2019 and 2020 in Riyadh.

|      |         | Air Pressure (hPa)    | Rel. Humidity (%) | Temperature (°C) | Wind speed (m/s) |                      |
|------|---------|-----------------------|-------------------|------------------|------------------|----------------------|
| 2019 | Average | 936.83                | 21.03             | 28.94            | 2.48             |                      |
|      | Max     | 946.01                | 60.78             | 40.10            | 4.78             |                      |
|      | Min     | 928.00                | 6.20              | 14.32            | 1.18             |                      |
|      | SD±     | 3.75                  | 11.17             | 7.16             | 0.81             |                      |
| 2020 | Average | 936.43                | 18.41             | 30.13            | 2.58             |                      |
|      | Max     | 945.02                | 64.35             | 39.25            | 4.56             |                      |
|      | Min     | 928.25                | 6.01              | 18.04            | 1.15             |                      |
|      | SD±     | 3.41                  | 10.68             | 5.92             | 0.79             |                      |
|      |         | Mean wind speed (m/s) |                   |                  |                  | Percent of total (%) |
| WDIR |         | 0-1.37                | 1.38-3.06         | 3.06-5.28        | >5.28            |                      |
| 2019 | N       | 16                    | 79                | 135              | 35               | 9.10                 |
|      | NNE     | 10                    | 147               | 110              | 13               | 9.62                 |
|      | NE      | 16                    | 86                | 34               | 0                | 4.67                 |
|      | ENE     | 34                    | 99                | 41               | 4                | 6.11                 |
|      | E       | 57                    | 71                | 4                | 0                | 4.53                 |
|      | ESE     | 61                    | 52                | 1                | 0                | 3.92                 |
|      | SE      | 94                    | 232               | 185              | 27               | 18.48                |
|      | SSE     | 82                    | 91                | 56               | 8                | 8.14                 |
|      | S       | 55                    | 101               | 32               | 4                | 6.60                 |
|      | SSW     | 36                    | 36                | 1                | 1                | 2.54                 |
|      | SW      | 24                    | 24                | 12               | 1                | 2.10                 |
|      | WSW     | 43                    | 50                | 32               | 15               | 4.81                 |
|      | W       | 23                    | 66                | 52               | 12               | 5.26                 |
|      | WNW     | 55                    | 68                | 22               | 1                | 5.02                 |
|      | NW      | 55                    | 58                | 11               | 0                | 4.26                 |
| NNW  | 36      | 94                    | 10                | 1                | 4.84             |                      |
| 2020 | N       | 8                     | 104               | 166              | 19               | 10.21                |
|      | NNE     | 11                    | 156               | 203              | 14               | 13.20                |
|      | NE      | 14                    | 96                | 63               | 1                | 5.98                 |
|      | ENE     | 23                    | 123               | 92               | 13               | 8.63                 |
|      | E       | 51                    | 53                | 4                | 0                | 3.71                 |
|      | ESE     | 59                    | 48                | 1                | 0                | 3.71                 |
|      | SE      | 87                    | 198               | 157              | 22               | 15.95                |
|      | SSE     | 64                    | 98                | 25               | 6                | 6.63                 |
|      | S       | 57                    | 95                | 47               | 8                | 7.12                 |
|      | SSW     | 25                    | 26                | 1                | 0                | 1.79                 |
|      | SW      | 17                    | 18                | 14               | 3                | 1.79                 |
|      | WSW     | 18                    | 40                | 45               | 16               | 4.09                 |
|      | W       | 33                    | 38                | 43               | 1                | 3.95                 |
|      | WNW     | 60                    | 81                | 6                | 0                | 5.05                 |
|      | NW      | 51                    | 48                | 2                | 0                | 3.47                 |
| NNW  | 29      | 104                   | 4                 | 0                | 4.71             |                      |

**Table S3.** Degree of similarity or discrepancy in the concentrations of air pollutants among the selected residential, traffic, and work sites during the selected study periods.

| Period               | Pollutant         |      | Residential site<br>(M-station)<br>Concentration | Traffic site<br>(F-station)<br>Concentration | Work site<br>(K-station)<br>Concentration | Residential<br>and work<br>CD | Residential<br>and traffic<br>CD | Traffic<br>and work<br>CD |
|----------------------|-------------------|------|--------------------------------------------------|----------------------------------------------|-------------------------------------------|-------------------------------|----------------------------------|---------------------------|
| Lockdown period      | CO                | Mean | 0.20                                             | 0.33                                         | 0.18                                      | 0.50                          | 0.20                             | 0.61                      |
|                      |                   | Max  | 1.55                                             | 3.25                                         | 0.81                                      |                               |                                  |                           |
|                      |                   | Min  | 0.01                                             | 0.01                                         | 0.09                                      |                               |                                  |                           |
|                      | NO                | Mean | 1.66                                             | 13.87                                        | 5.08                                      | 0.36                          | 0.46                             | 0.49                      |
|                      |                   | Max  | 51.20                                            | 275.40                                       | 63.90                                     |                               |                                  |                           |
|                      |                   | Min  | 0.10                                             | 0.10                                         | 0.05                                      |                               |                                  |                           |
|                      | NO <sub>2</sub>   | Mean | 13.19                                            | 18.68                                        | 11.20                                     | 0.53                          | 0.33                             | 0.46                      |
|                      |                   | Max  | 62.10                                            | 77.20                                        | 92.75                                     |                               |                                  |                           |
|                      |                   | Min  | 1.80                                             | 0.70                                         | 0.10                                      |                               |                                  |                           |
|                      | NO <sub>x</sub>   | Mean | 14.55                                            | 30.69                                        | 23.58                                     | 0.53                          | 0.39                             | 0.48                      |
|                      |                   | Max  | 110.40                                           | 331.10                                       | 119.00                                    |                               |                                  |                           |
|                      |                   | Min  | 1.70                                             | 0.50                                         | 0.10                                      |                               |                                  |                           |
|                      | SO <sub>2</sub>   | Mean | 2.11                                             |                                              | 2.53                                      | 0.57                          | -                                | -                         |
|                      |                   | Max  | 16.43                                            | -                                            | 30.50                                     |                               |                                  |                           |
|                      |                   | Min  | 0.01                                             |                                              | 0.30                                      |                               |                                  |                           |
|                      | PM <sub>10</sub>  | Mean | 179.49                                           | 173.80                                       | 155.73                                    | 0.32                          | 0.26                             | 0.33                      |
|                      |                   | Max  | 1185.59                                          | 1099.35                                      | 1292.80                                   |                               |                                  |                           |
|                      |                   | Min  | 44.54                                            | 47.95                                        | 13.33                                     |                               |                                  |                           |
|                      | PM <sub>2.5</sub> | Mean | 52.42                                            | 49.07                                        | 60.98                                     | 0.04                          | 0.27                             | 0.09                      |
|                      |                   | Max  | 306.50                                           | 267.03                                       | 309.05                                    |                               |                                  |                           |
|                      |                   | Min  | 12.40                                            | 15.01                                        | 12.48                                     |                               |                                  |                           |
| Unrestricted periods | CO                | Mean | 0.33                                             | 0.67                                         | 0.26                                      | 0.40                          | 0.21                             | 0.56                      |
|                      |                   | Max  | 1.21                                             | 3.12                                         | 0.89                                      |                               |                                  |                           |
|                      |                   | Min  | 0.02                                             | 0.02                                         | 0.10                                      |                               |                                  |                           |
|                      | NO                | Mean | 4.75                                             | 32.01                                        | 7.08                                      | 0.12                          | 0.43                             | 0.49                      |
|                      |                   | Max  | 81.50                                            | 310.90                                       | 90.15                                     |                               |                                  |                           |
|                      |                   | Min  | 0.10                                             | 0.10                                         | 0.10                                      |                               |                                  |                           |
|                      | NO <sub>2</sub>   | Mean | 24.48                                            | 29.92                                        | 20.31                                     | 0.56                          | 0.17                             | 0.57                      |
|                      |                   | Max  | 69.90                                            | 73.50                                        | 60.65                                     |                               |                                  |                           |
|                      |                   | Min  | 6.70                                             | 7.00                                         | 0.15                                      |                               |                                  |                           |
|                      | NO <sub>x</sub>   | Mean | 29.10                                            | 61.67                                        | 27.30                                     | 0.56                          | 0.23                             | 0.66                      |
|                      |                   | Max  | 143.50                                           | 358.10                                       | 133.45                                    |                               |                                  |                           |
|                      |                   | Min  | 6.90                                             | 8.20                                         | 0.10                                      |                               |                                  |                           |
|                      | SO <sub>2</sub>   | Mean | 1.54                                             | -                                            | 2.70                                      | 0.60                          | -                                | -                         |
|                      |                   | Max  | 9.58                                             | -                                            | 33.85                                     |                               |                                  |                           |
|                      |                   | Min  | 0.06                                             | -                                            | 0.65                                      |                               |                                  |                           |
|                      | PM <sub>10</sub>  | Mean | 235.29                                           | 206.97                                       | 144.80                                    | 0.27                          | 0.32                             | 0.22                      |
|                      |                   | Max  | 960.08                                           | 542.20                                       | 414.35                                    |                               |                                  |                           |
|                      |                   | Min  | 65.55                                            | 40.01                                        | 74.50                                     |                               |                                  |                           |
|                      | PM <sub>2.5</sub> | Mean | 60.09                                            | 57.71                                        | 33.62                                     | 0.24                          | 0.34                             | 0.33                      |
|                      |                   | Max  | 166.48                                           | 159.97                                       | 90.90                                     |                               |                                  |                           |
|                      |                   | Min  | 17.75                                            | 6.11                                         | 15.22                                     |                               |                                  |                           |

**Table S4.** GAMEP and USEPA air pollutant standards.

| <b>Pollutant</b>                             | <b>GAMEP Std.</b>     | <b>USEPA Std.</b>     | <b>Averaging Time</b> |
|----------------------------------------------|-----------------------|-----------------------|-----------------------|
| <b>Nitrogen Dioxide (NO<sub>2</sub>)</b>     | 0.35 ppm              | 0.1 ppm               | 1 h                   |
|                                              | 0.05 ppm              | 0.053 ppm             | Annual                |
| <b>Ozone (O<sub>3</sub>)</b>                 | 0.12 ppm              | 0.12 ppm              | 1 h                   |
|                                              | 0.08 ppm              | 0.075 ppm             | 8 h                   |
| <b>Particulate Matter (PM<sub>10</sub>)</b>  | 340 µg/m <sup>3</sup> | 150 µg/m <sup>3</sup> | 24 h                  |
|                                              | 80 µg/m <sup>3</sup>  | ---                   | Annual                |
| <b>Particulate Matter (PM<sub>2.5</sub>)</b> | 35 µg/m <sup>3</sup>  | 35 µg/m <sup>3</sup>  | 2 h                   |
|                                              | 15 µg/m <sup>3</sup>  | 15 µg/m <sup>3</sup>  | Annual                |
| <b>Sulfur Dioxide (SO<sub>2</sub>)</b>       | 0.28 ppm              | 0.075 ppm             | 1 h                   |
|                                              | 0.14 ppm              | 0.14 ppm              | 24 h                  |
|                                              | 0.03 ppm              | 0.03 ppm              | Annual                |
| <b>Carbon Monoxide (CO)</b>                  | 32 ppm                | 35 ppm                | 1 h                   |
|                                              | 8.1 ppm               | 9 ppm                 | 8 h                   |
